# Supplementary material for: Effects of Global and Specific DNA-Binding Proteins on Transcriptional Regulation of the E. coli bgl Operon
Source: MDPI journal article supplement (doi:10.3390/ijms231810343), 2022-09-07
Supplement: s1 [file s1]

Supplementary Data

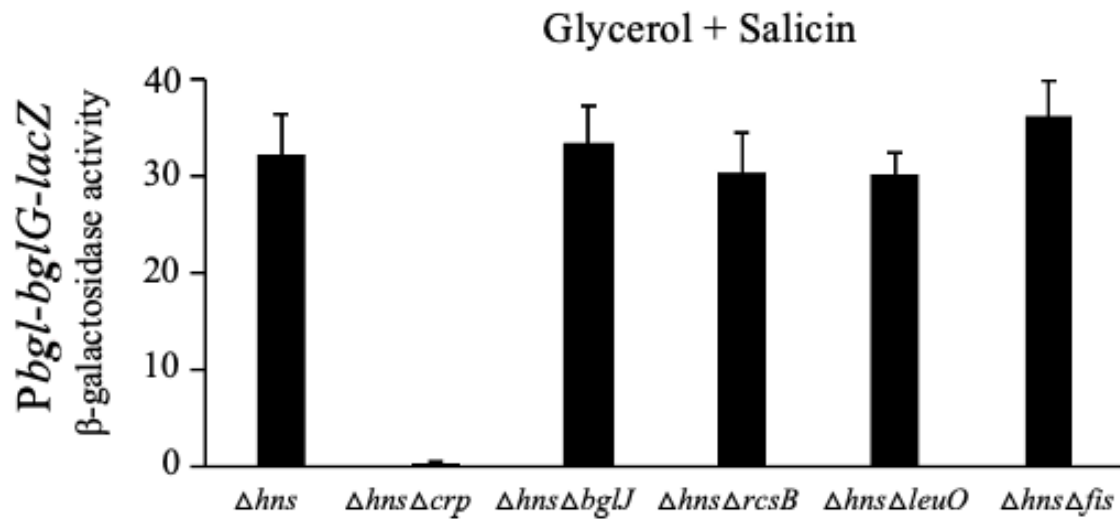

**Figure S1. Effects of various transcription factors on *bgl* operon activities in the absence of H-NS.** The genes encoding transcription regulators were individually deleted in a *hns* deletion background. Using the operon reporter *PbgI-bglG-lacZ*, the *bgl* operon activities from all the double mutants were measured. Strain cultures, sample collections and β-galactosidase assays were carried out as for Figure 1.

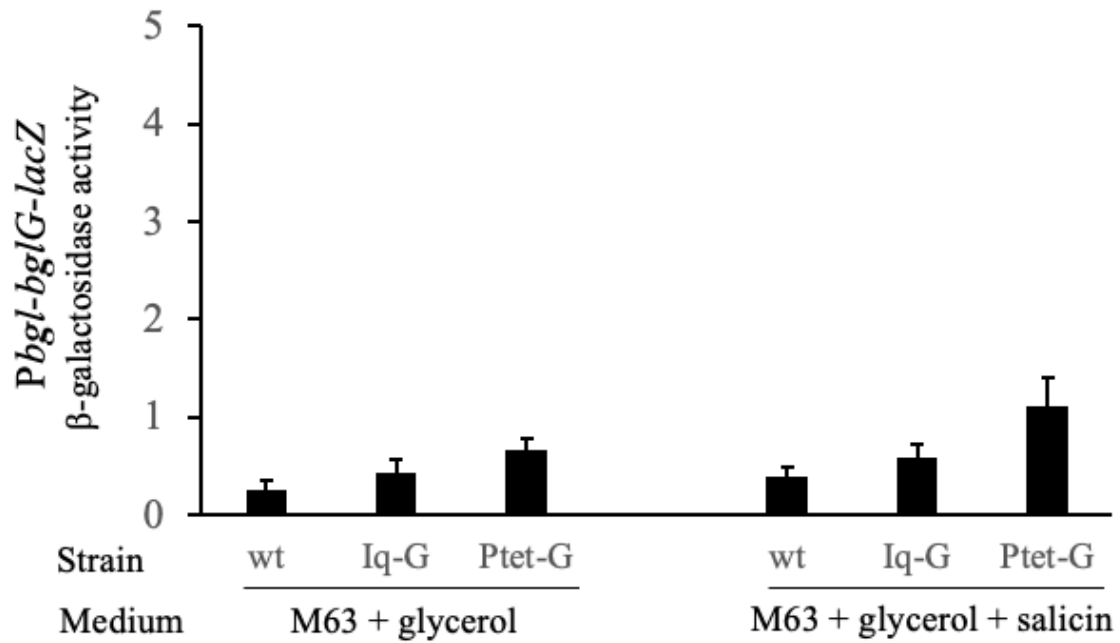

**Figure S2. H-NS repression of *bgl* operon expression in cells over-expressing *bglG*.** The *bglG* gene was driven by constitutive promoters *lacIq* (medium strength) and *Ptet* (strong) at the *intS* locus. Using *P<sub>bgl-bglG-lacZ</sub>* as the reporter, the operon activities were measured when cells were cultured in M63 with glycerol only (left) or glycerol and salicin (right). Sample collection and  $\beta$ -galactosidase assays were carried out as for Figure 1.

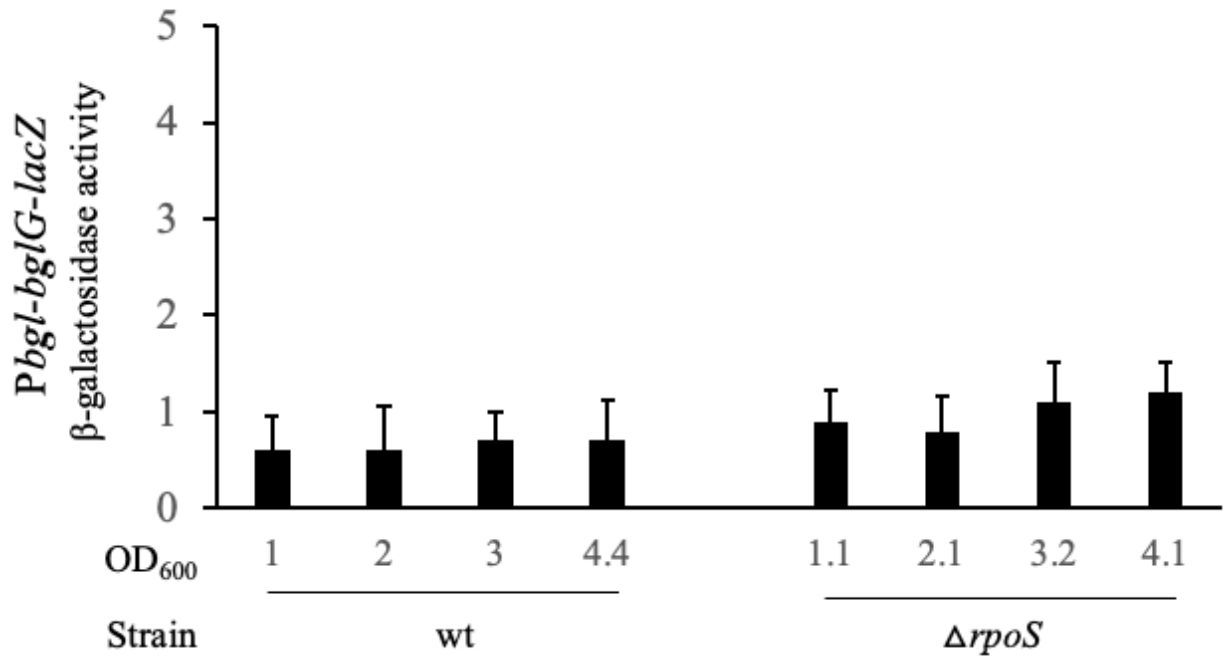

**Figure S3. Effect of an *rpoS* deletion mutation on *bgl* operon expression as the cells approach and enter the stationary growth phase.** Using *PbgI-bglG-lacZ* as the reporter, the operon activities were measured when wild type and  $\Delta rpoS$  cells were cultured in M63 with glycerol and salicin at 37°C. Samples were collected when the OD<sub>600</sub> reached about 1, 2, 3 and 4, respectively. β-galactosidase assays were carried out as for Figure 1.

**Supplementary Table S1. Strains and plasmids used in this study**

| Strains or plasmids                            | Genotype or description                                                                                                         | Reference  |
|------------------------------------------------|---------------------------------------------------------------------------------------------------------------------------------|------------|
| <b>Strains</b>                                 |                                                                                                                                 |            |
| BW25113                                        | Wild type, <i>lacI<sup>q</sup> rrnB<sub>T14</sub> ΔlacZ<sub>WJ</sub> ΔhsdR514 ΔaraBAD<sub>AH33</sub> ΔrhaBAD<sub>LD78</sub></i> | [1]        |
| Bgl <sup>+</sup>                               | IS5 in a reverse orientation at -207.5 upstream of <i>bglG</i> translation start site in BW25113                                | This study |
| Δ <i>crp</i>                                   | Deletion of <i>crp</i> in BW25113                                                                                               | [2]        |
| Δ <i>bglG</i>                                  | Deletion of <i>bglG</i> in BW25113                                                                                              | This study |
| Δ <i>bglJ</i>                                  | Deletion of <i>bglJ</i> in BW25113                                                                                              | This study |
| Δ <i>rcsB</i>                                  | Deletion of <i>rcsB</i> in BW25113                                                                                              | This study |
| Δ <i>bglJ</i> Δ <i>rcsB</i>                    | Deletion of <i>bglJ</i> and <i>rcsB</i> in BW25113                                                                              | This study |
| Δ <i>leuO</i>                                  | Deletion of <i>leuO</i> in BW25113                                                                                              | This study |
| Δ <i>hns</i>                                   | Deletion of <i>hns</i> in BW25113                                                                                               | This study |
| Δ <i>stpA</i>                                  | Deletion of <i>stpA</i> in BW25113                                                                                              | This study |
| Δ <i>hns</i> Δ <i>stpA</i>                     | Deletion of <i>hns</i> and <i>stpA</i> in BW25113                                                                               | This study |
| Δ <i>fis</i>                                   | Deletion of <i>fis</i> in BW25113                                                                                               | This study |
| Iq-G                                           | <i>lacIq</i> driving <i>bglG</i> at the <i>intS</i> locus in BW25113                                                            | [3]        |
| Ptet-G                                         | Ptet driving <i>bglG</i> at the <i>intS</i> locus in BW25113                                                                    | [3]        |
| BW_P <i>bgl</i> -Z                             | P <i>bgl</i> driving <i>lacZ</i> at the <i>lac</i> locus in BW25113                                                             | This study |
| Bgl <sup>+</sup> _P <i>bgl</i> -Z              | P <i>bgl</i> driving <i>lacZ</i> at the <i>lac</i> locus in Bgl <sup>+</sup>                                                    | This study |
| Δ <i>crp</i> _P <i>bgl</i> -Z                  | P <i>bgl</i> driving <i>lacZ</i> at the <i>lac</i> locus in Δ <i>crp</i>                                                        | This study |
| Δ <i>bglG</i> _P <i>bgl</i> -Z                 | P <i>bgl</i> driving <i>lacZ</i> at the <i>lac</i> locus in Δ <i>bglG</i>                                                       | This study |
| Δ <i>bglJ</i> _P <i>bgl</i> -Z                 | P <i>bgl</i> driving <i>lacZ</i> at the <i>lac</i> locus in Δ <i>bglJ</i>                                                       | This study |
| Δ <i>rcsB</i> _P <i>bgl</i> -Z                 | P <i>bgl</i> driving <i>lacZ</i> at the <i>lac</i> locus in Δ <i>rcsB</i>                                                       | This study |
| Δ <i>bglJ</i> Δ <i>rcsB</i> _P <i>bgl</i> -Z   | P <i>bgl</i> driving <i>lacZ</i> at the <i>lac</i> locus in Δ <i>bglJ</i> Δ <i>rcsB</i>                                         | This study |
| Δ <i>leuO</i> _P <i>bgl</i> -Z                 | P <i>bgl</i> driving <i>lacZ</i> at the <i>lac</i> locus in Δ <i>leuO</i>                                                       | This study |
| Δ <i>hns</i> _P <i>bgl</i> -Z                  | P <i>bgl</i> driving <i>lacZ</i> at the <i>lac</i> locus in Δ <i>hns</i>                                                        | This study |
| Δ <i>stpA</i> _P <i>bgl</i> -Z                 | P <i>bgl</i> driving <i>lacZ</i> at the <i>lac</i> locus in Δ <i>stpA</i>                                                       | This study |
| Δ <i>fis</i> _P <i>bgl</i> -Z                  | P <i>bgl</i> driving <i>lacZ</i> at the <i>lac</i> locus in Δ <i>fis</i>                                                        | This study |
| BW25113_G-Z                                    | P <i>bgl</i> - <i>bglG</i> driving <i>lacZ</i> at the <i>lac</i> locus in BW25113                                               | [3]        |
| Bgl <sup>+</sup> _G-Z                          | P <i>bgl</i> - <i>bglG</i> driving <i>lacZ</i> at the <i>lac</i> locus in Bgl <sup>+</sup>                                      | This study |
| Δ <i>crp</i> _G-Z                              | P <i>bgl</i> - <i>bglG</i> driving <i>lacZ</i> at the <i>lac</i> locus in Δ <i>crp</i>                                          | This study |
| Δ <i>bglG</i> _G-Z                             | P <i>bgl</i> - <i>bglG</i> driving <i>lacZ</i> at the <i>lac</i> locus in Δ <i>bglG</i>                                         | This study |
| Δ <i>bglJ</i> _G-Z                             | P <i>bgl</i> - <i>bglG</i> driving <i>lacZ</i> at the <i>lac</i> locus in Δ <i>bglJ</i>                                         | This study |
| Δ <i>rcsB</i> _G-Z                             | P <i>bgl</i> - <i>bglG</i> driving <i>lacZ</i> at the <i>lac</i> locus in Δ <i>rcsB</i>                                         | This study |
| Δ <i>bglJ</i> Δ <i>rcsB</i> _G-Z               | P <i>bgl</i> - <i>bglG</i> driving <i>lacZ</i> at the <i>lac</i> locus in Δ <i>bglJ</i> Δ <i>rcsB</i>                           | This study |
| Δ <i>leuO</i> _G-Z                             | P <i>bgl</i> - <i>bglG</i> driving <i>lacZ</i> at the <i>lac</i> locus in Δ <i>leuO</i>                                         | This study |
| Δ <i>hns</i> _G-Z                              | P <i>bgl</i> - <i>bglG</i> driving <i>lacZ</i> at the <i>lac</i> locus in Δ <i>hns</i>                                          | This study |
| Δ <i>stpA</i> _G-Z                             | P <i>bgl</i> - <i>bglG</i> driving <i>lacZ</i> at the <i>lac</i> locus in Δ <i>stpA</i>                                         | This study |
| Δ <i>fis</i> _G-Z                              | P <i>bgl</i> - <i>bglG</i> driving <i>lacZ</i> at the <i>lac</i> locus in Δ <i>fis</i>                                          | This study |
| Δ <i>hns</i> Δ <i>stpA</i> _G-Z                | P <i>bgl</i> - <i>bglG</i> driving <i>lacZ</i> at the <i>lac</i> locus in Δ <i>hns</i> Δ <i>stpA</i>                            | This study |
| Ptet-G_G-Z                                     | P <i>bgl</i> - <i>bglG</i> driving <i>lacZ</i> at the <i>lac</i> locus in Ptet-G                                                | [3]        |
| Iq-G_G-Z                                       | P <i>bgl</i> - <i>bglG</i> driving <i>lacZ</i> at the <i>lac</i> locus in Iq-G                                                  | [3]        |
| BW_IS5P <i>bgl</i> -Z                          | IS5P <i>bgl</i> driving <i>lacZ</i> at the <i>lac</i> locus in BW25113                                                          | This study |
| Δ <i>crp</i> _IS5P <i>bgl</i> -Z               | IS5P <i>bgl</i> driving <i>lacZ</i> at the <i>lac</i> locus in Δ <i>crp</i>                                                     | This study |
| Δ <i>hns</i> _IS5P <i>bgl</i> -Z               | IS5P <i>bgl</i> driving <i>lacZ</i> at the <i>lac</i> locus in Δ <i>hns</i>                                                     | This study |
| Δ <i>hns</i> Δ <i>stpA</i> _IS5P <i>bgl</i> -Z | IS5P <i>bgl</i> driving <i>lacZ</i> at the <i>lac</i> locus in Δ <i>hns</i> Δ <i>stpA</i>                                       | This study |
| BW25113_IS5G-Z                                 | IS5P <i>bgl</i> - <i>bglG</i> driving <i>lacZ</i> at the <i>lac</i> locus in BW25113                                            | This study |
| Bgl <sup>+</sup> _IS5G-Z                       | IS5P <i>bgl</i> - <i>bglG</i> driving <i>lacZ</i> at the <i>lac</i> locus in Bgl <sup>+</sup>                                   | This study |
| Δ <i>crp</i> _IS5G-Z                           | IS5P <i>bgl</i> - <i>bglG</i> driving <i>lacZ</i> at the <i>lac</i> locus in Δ <i>crp</i>                                       | This study |
| Δ <i>hns</i> _IS5G-Z                           | IS5P <i>bgl</i> - <i>bglG</i> driving <i>lacZ</i> at the <i>lac</i> locus in Δ <i>hns</i>                                       | This study |

|                                                    |                                                                                                                |            |
|----------------------------------------------------|----------------------------------------------------------------------------------------------------------------|------------|
| Bgl <sup>+</sup> Δ <i>fis</i>                      | Deletion of <i>fis</i> in Bgl <sup>+</sup>                                                                     | This study |
| Bgl <sup>+</sup> Δ <i>crp</i>                      | Deletion of <i>crp</i> in Bgl <sup>+</sup>                                                                     | This study |
| Bgl <sup>+</sup> Δ <i>crp</i> Δ <i>fis</i>         | Deletion of <i>crp</i> and <i>fis</i> in Bgl <sup>+</sup>                                                      | This study |
| Bgl <sup>+</sup> Δ <i>fis</i> _IS5G-Z              | IS5 <i>Pbgl-bglG</i> driving <i>lacZ</i> at the <i>lac</i> locus in Bgl <sup>+</sup> Δ <i>fis</i>              | This study |
| Bgl <sup>+</sup> Δ <i>crp</i> _IS5G-Z              | IS5 <i>Pbgl-bglG</i> driving <i>lacZ</i> at the <i>lac</i> locus in Bgl <sup>+</sup> Δ <i>crp</i>              | This study |
| Bgl <sup>+</sup> Δ <i>crp</i> Δ <i>fis</i> _IS5G-Z | IS5 <i>Pbgl-bglG</i> driving <i>lacZ</i> at the <i>lac</i> locus in Bgl <sup>+</sup> Δ <i>crp</i> Δ <i>fis</i> | This study |
| <i>hns</i> L30P                                    | Mutation of leucine to proline at 30 <sup>th</sup> codon in the <i>hns</i> gene                                | This study |
| <i>hns</i> L30P_ <i>Pbgl</i> -Z                    | <i>Pbgl</i> driving <i>lacZ</i> at the <i>lac</i> locus in <i>hns</i> L30P                                     | This study |
| <i>hns</i> L30P_G-Z                                | <i>Pbgl-bglG</i> driving <i>lacZ</i> at the <i>lac</i> locus in <i>hns</i> L30P                                | This study |
| BW25113_tG-Z                                       | A truncated <i>Pbgl-bglG</i> driving <i>lacZ</i> at the <i>lac</i> locus in BW25113                            | This study |
| Bgl <sup>+</sup> _tG-Z                             | A truncated <i>Pbgl-bglG</i> driving <i>lacZ</i> at the <i>lac</i> locus in Bgl <sup>+</sup>                   | This study |
| <b>Plasmids</b>                                    |                                                                                                                |            |
| pKDT                                               | A <i>rrnB</i> terminator ( <i>rrnBT</i> ) in pKD13                                                             | [4]        |
| pKDT_ <i>Pbgl</i>                                  | <i>Pbgl</i> cloned downstream of the <i>rrnBT</i> in pKDT                                                      | This study |
| pKDT_IS5 <i>Pbgl-bglG</i>                          | IS5 <i>Pbgl-bglG</i> cloned downstream of the <i>rrnBT</i> in pKDT                                             | This study |
| pKDT-t <i>Pbgl-bglG</i>                            | t <i>Pbgl-bglG</i> cloned downstream of the <i>rrnBT</i> in pKDT                                               | This study |

## References

1. Datsenko, K. A.; Wanner, B. L., One-step inactivation of chromosomal genes in *Escherichia coli* K-12 using PCR products. *Proc Natl Acad Sci U S A* **2000**, 97, (12), 6640-5. DOI: 10.1073/pnas.120163297. PMID: 10829079.
2. Zhang, Z.; Saier, M. H., Jr., A mechanism of transposon-mediated directed mutation. *Mol Microbiol* **2009**, 74, (1), 29-43. DOI: 10.1111/j.1365-2958.2009.06831.x. PMID: 19682247.
3. Zhang, Z.; Zhou, K.; Tran, D.; Saier, M., Insertion Sequence (IS) Element-Mediated Activating Mutations of the Cryptic Aromatic beta-Glucoside Utilization (BglGFB) Operon Are Promoted by the Anti-Terminator Protein (BglG) in *Escherichia coli*. *Int J Mol Sci* **2022**, 23, (3). DOI: 10.3390/ijms23031505. PMID: 35163427.
4. Klumpp, S.; Zhang, Z.; Hwa, T., Growth rate-dependent global effects on gene expression in bacteria. *Cell* **2009**, 139, (7), 1366-75. DOI: 10.1016/j.cell.2009.12.001. PMID: 20064380.

**Supplementary Table S2. Oligonucleotides used in this study**

| Name        | Sequence                                                                                                       | Use                                                                                                                                                                                                 |
|-------------|----------------------------------------------------------------------------------------------------------------|-----------------------------------------------------------------------------------------------------------------------------------------------------------------------------------------------------|
| Pbgl-Xho-F  | atactcgagtggcgatgagctggataaactgctg                                                                             | Cloning <i>Pbgl</i> , <i>Pbgl-bglG</i> or IS5 <i>Pbgl-bglG</i> into pKDT                                                                                                                            |
| Pbgl-Bam-R  | ttaggatcctgcagtaacaatccagtcatttattaatg                                                                         | Cloning <i>Pbgl</i> into pKDT                                                                                                                                                                       |
| bglG-Bam-R  | taggatccttagactatTTTTCTGGCTAACTCCGTC                                                                           | Cloning <i>Pbgl-bglG</i> , IS5 <i>Pbgl-bglG</i> or t <i>Pbgl-bglG</i> into pKDT                                                                                                                     |
| tPbgl-Xho-F | aatctcgagctaaaattacacaaagtaataactg                                                                             | Cloning t <i>Pbgl-bglG</i> into pKDT                                                                                                                                                                |
| Pbgl-F2     | tggcgatgagctggataaactg                                                                                         | Verification of <i>Pbgl</i> cloning                                                                                                                                                                 |
| Pbgl-R2     | tcagttcatgactgctcaaggcatac                                                                                     | Verification of <i>Pbgl</i> cloning                                                                                                                                                                 |
| bglG-ver-F1 | agcatggcaatgtgcggaacggatc                                                                                      | Verification of <i>Pbgl-bglG</i> cloning                                                                                                                                                            |
| bglG-ver-F2 | ttgtgggtgttattgatgatcaacag                                                                                     | Verification of <i>Pbgl-bglG</i> cloning                                                                                                                                                            |
| bglG-ver-R1 | taactgcgtgacacctgcaacatc                                                                                       | Verification of <i>Pbgl-bglG</i> cloning                                                                                                                                                            |
| bglG-ver-R2 | tcccaagcgtcctgcgctaaagag                                                                                       | Verification of <i>Pbgl-bglG</i> cloning                                                                                                                                                            |
| IS5R-ver-R1 | accttatccgctggaaacctgctac                                                                                      | Verification of IS5 <i>Pbgl-bglG</i> cloning                                                                                                                                                        |
| IS5R-ver-R2 | aaggaagaacctgaaacagcatc                                                                                        | Verification of IS5 <i>Pbgl-bglG</i> cloning                                                                                                                                                        |
| Pbgl-Z-P1   | gcatttacgttgacaccatcgaatggcgcaaaacctttcgcggtatgtgtaggctgga<br>gctgcttc                                         | Amplification of <i>Pbgl</i> , <i>Pbgl-bglG</i> or IS5 <i>Pbgl-bglG</i> with <i>km<sup>r</sup></i> from<br>pKDT_ <i>Pbgl</i> , pKDT_ <i>Pbgl-bglG</i> or pKDT_ IS5 <i>Pbgl-bglG</i>                 |
| Pbgl-Z-P2   | cgacggccagtgaaatccgtaatcatggatcatagctgttctctgtgtgaaatgcagtaa<br>caatccagtcatttattaatg                          | Amplification of <i>Pbgl</i> with <i>km<sup>r</sup></i> from plasmid pKDT_ <i>Pbgl</i>                                                                                                              |
| bglG-Z2     | cgacggccagtgaaatccgtaatcatggatcatagctgttctctgtgtgaaattagactat<br>tttctggctaactcc                               | Amplification of <i>Pbgl-bglG</i> , IS5 <i>Pbgl-bglG</i> or IS5 <i>Pbgl-bglG</i> with <i>km<sup>r</sup></i><br>from pKDT_ <i>Pbgl-bglG</i> , pKDT_ IS5 <i>Pbgl-bglG</i> or pKDT_ t <i>Pbgl-bglG</i> |
| hns-AB-F    | ctcttcgtgcgcaggcaagagaatgtacacttgaaacgctggaagaaatgctcctaa<br>ttttgttgacactctatc                                | Amplification and chromosomal integration of <i>tetA:sacB</i>                                                                                                                                       |
| hns-AB-R    | agccgcgctttcttcttcgcgacgttcgtaacaacaacttctaattttcatcaaagg<br>aaaactgtccatgctc                                  | Amplification and chromosomal integration of <i>tetA:sacB</i>                                                                                                                                       |
| hns-100     | cttcgtgcgcaggcaagagaatgtacacttgaaacgctggaagaaat <b>gctg</b> aaaa<br>attagaagttgtgttaacgaacgtcgcgaagaagaaagcgcg | A partial <i>hns</i> fragment carrying the L30P mutation (bolded)                                                                                                                                   |
| hns-F       | cacttaaaattctgaacaacatccgtactcttcgtgcgcaggcaagagaatg                                                           | Amplification of hns-100                                                                                                                                                                            |
| hns-R       | gagtgcgtcttcaacttcagcagcagccgcgctttcttcttcgcgacgttc                                                            | Amplification of hns-100                                                                                                                                                                            |
| hns-ver-R   | agattattgcttgatcaggaaatcgctc                                                                                   | Verification of <i>hns</i> L30P on chromosome                                                                                                                                                       |
